# Supplementary material for: A Federated Online Search Tool for Biospecimens (Sample Locator): Usability Study
Source: PubMed Central journal article supplement (PMC7463387; doi:10.2196/17739), 2020-08-18

# Multimedia Appendix 3 – Interaction designs based on the provided use cases

## Interaction design prepared for use case 1:

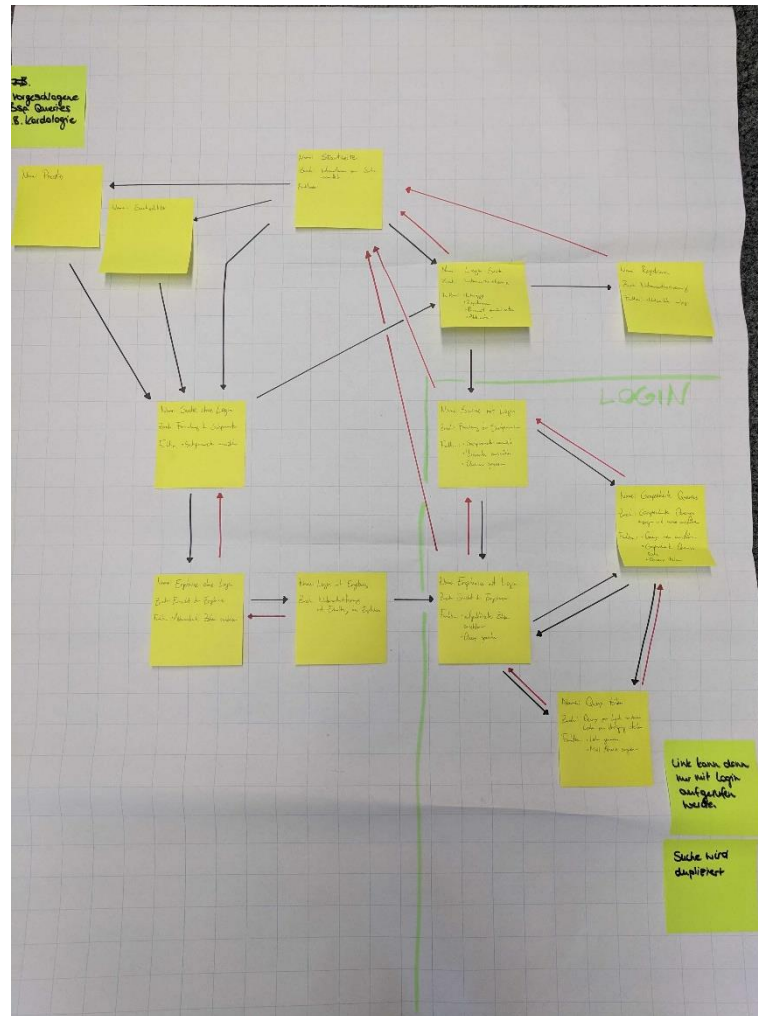

## Interaction design prepared for use case 2:

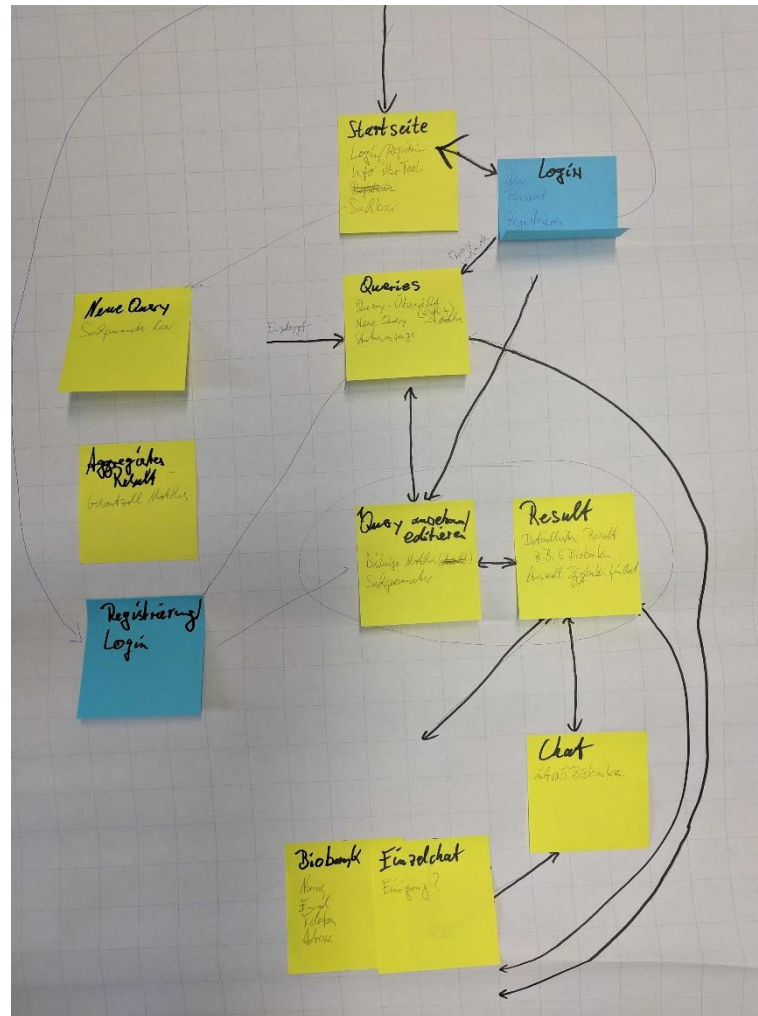

Supplement: jmir_v22i8e17739_app3.pdf [file jmir_v22i8e17739_app3.pdf]
