# Supplementary material for: A Federated Online Search Tool for Biospecimens (Sample Locator): Usability Study
Source: PubMed Central journal article supplement (PMC7463387; doi:10.2196/17739), 2020-08-18
Supplement: jmir_v22i8e17739_app4.pdf [file jmir_v22i8e17739_app4.pdf]

# Multimedia Appendix 4 – Preliminary Work: Sketched functionalities and workshop mockups

## A. Sketched functionalities

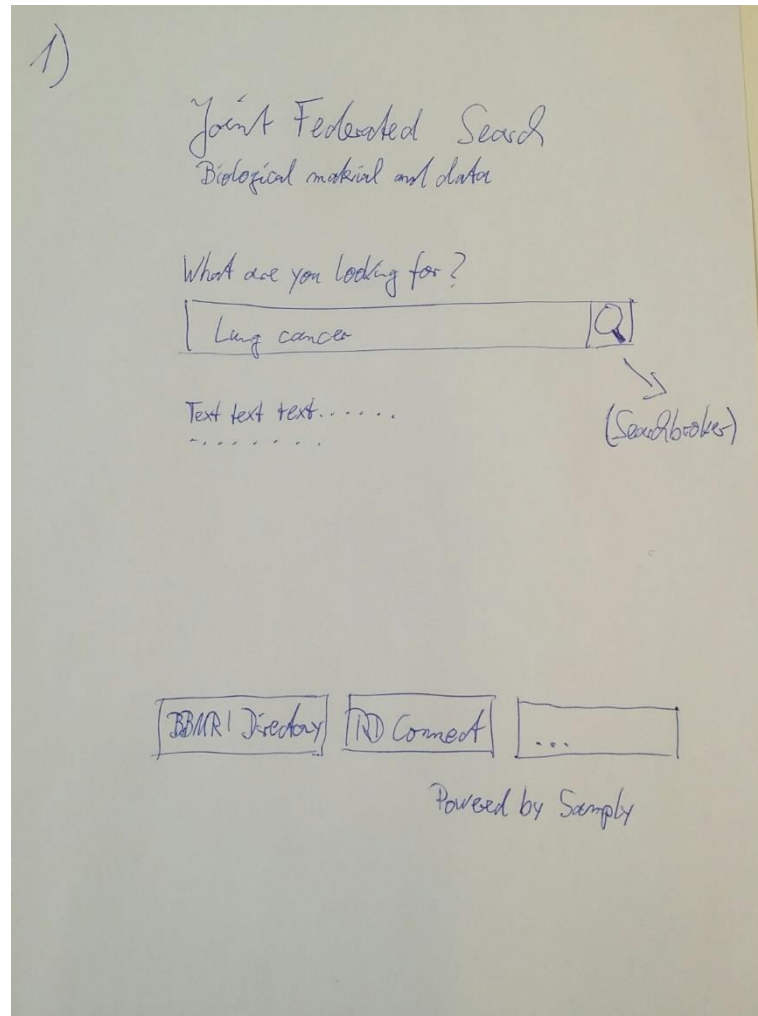

Multimedia Appendix 4. Preliminary Work: Sketched functionalities and workshop mockups.  
Schüttler et al: Usability Analysis of the "Sample Locator": a Federated Online Search Tool for Biospecimens

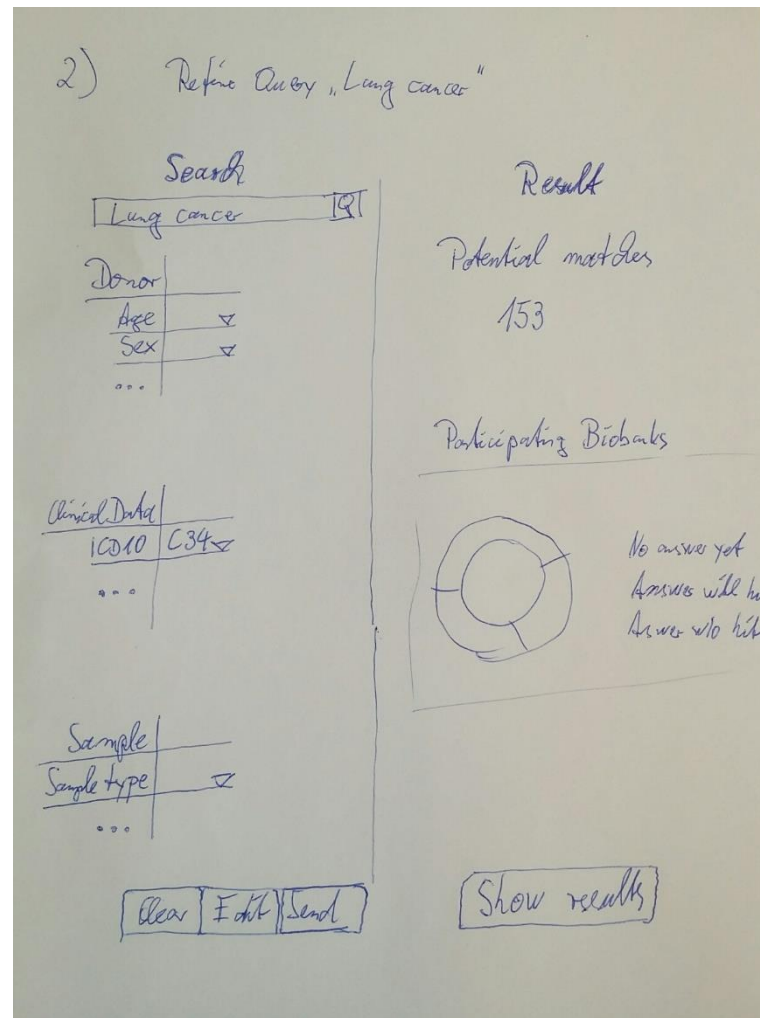

Multimedia Appendix 4. Preliminary Work: Sketched functionalities and workshop mockups.  
Schüttler et al: Usability Analysis of the "Sample Locator": a Federated Online Search Tool for Biospecimens

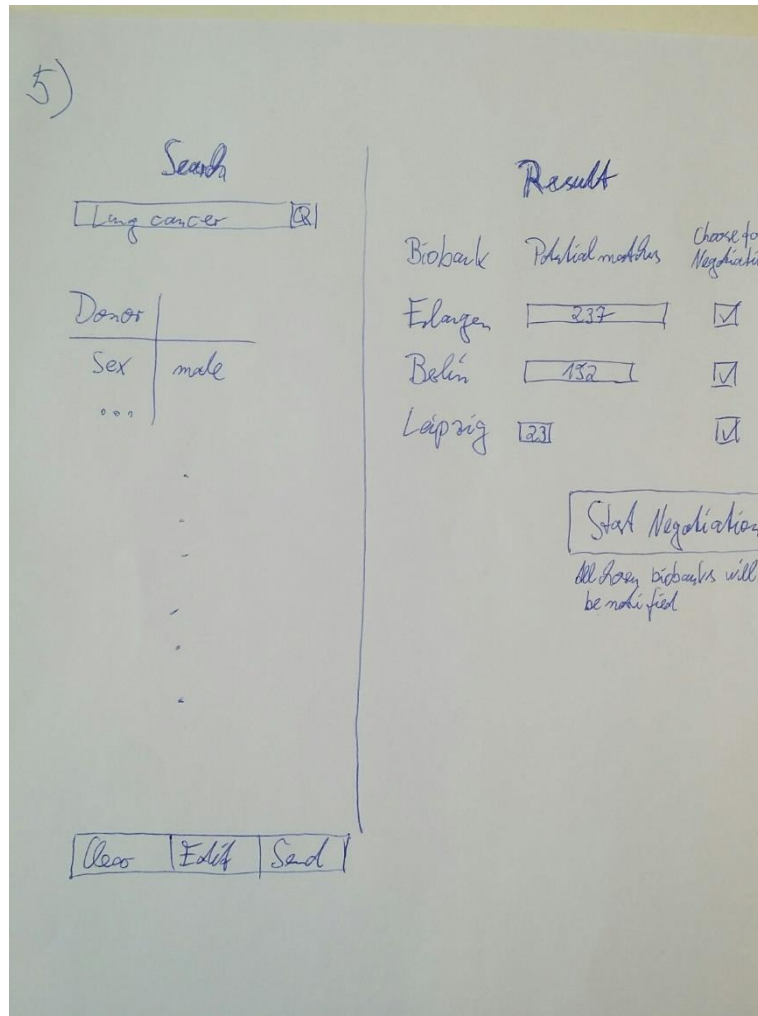

## B. Workshop mockups

A Web Page

https://

Suche      Queries      Logout

**Speichern**      **Suchen**

**Einschlusskriterium**

Q search

Biobanken: alle

Geschlecht weiblich

Alter > 35

**Ausschlusskriterium**

Q search

Gewicht > 100 kg

Multimedia Appendix 4. Preliminary Work: Sketched functionalities and workshop mockups.  
Schüttler et al: Usability Analysis of the "Sample Locator": a Federated Online Search Tool for Biospecimens

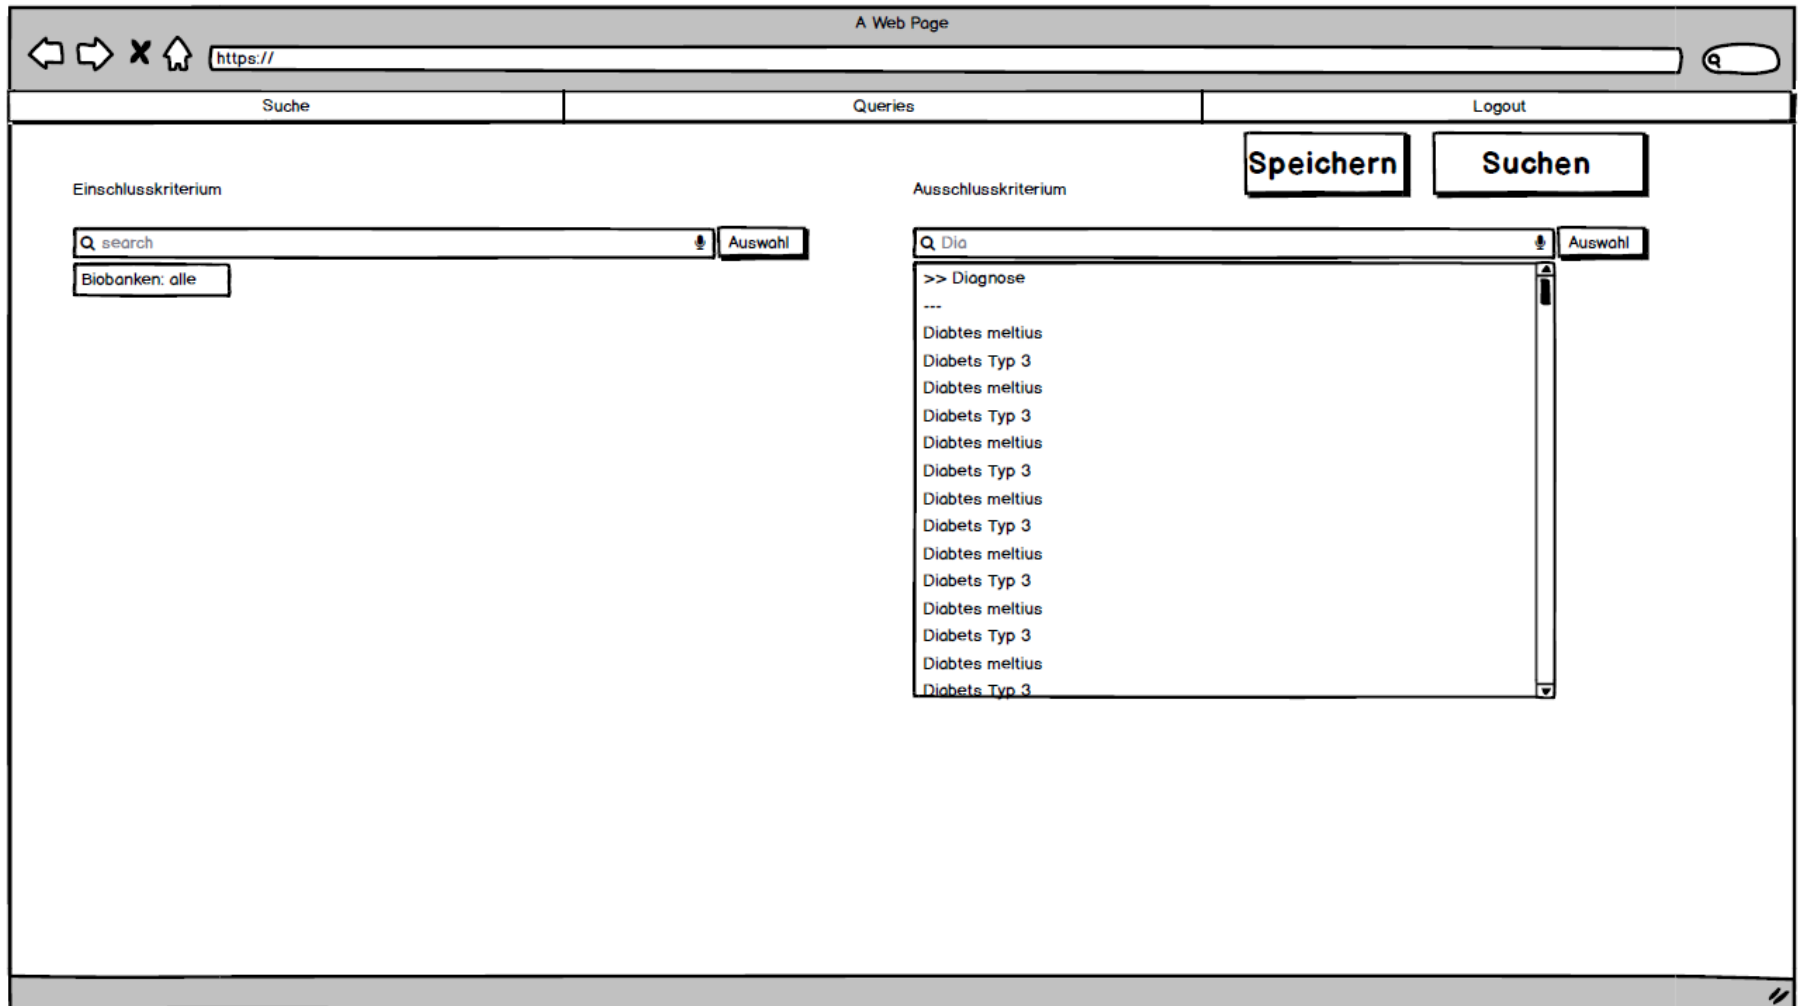

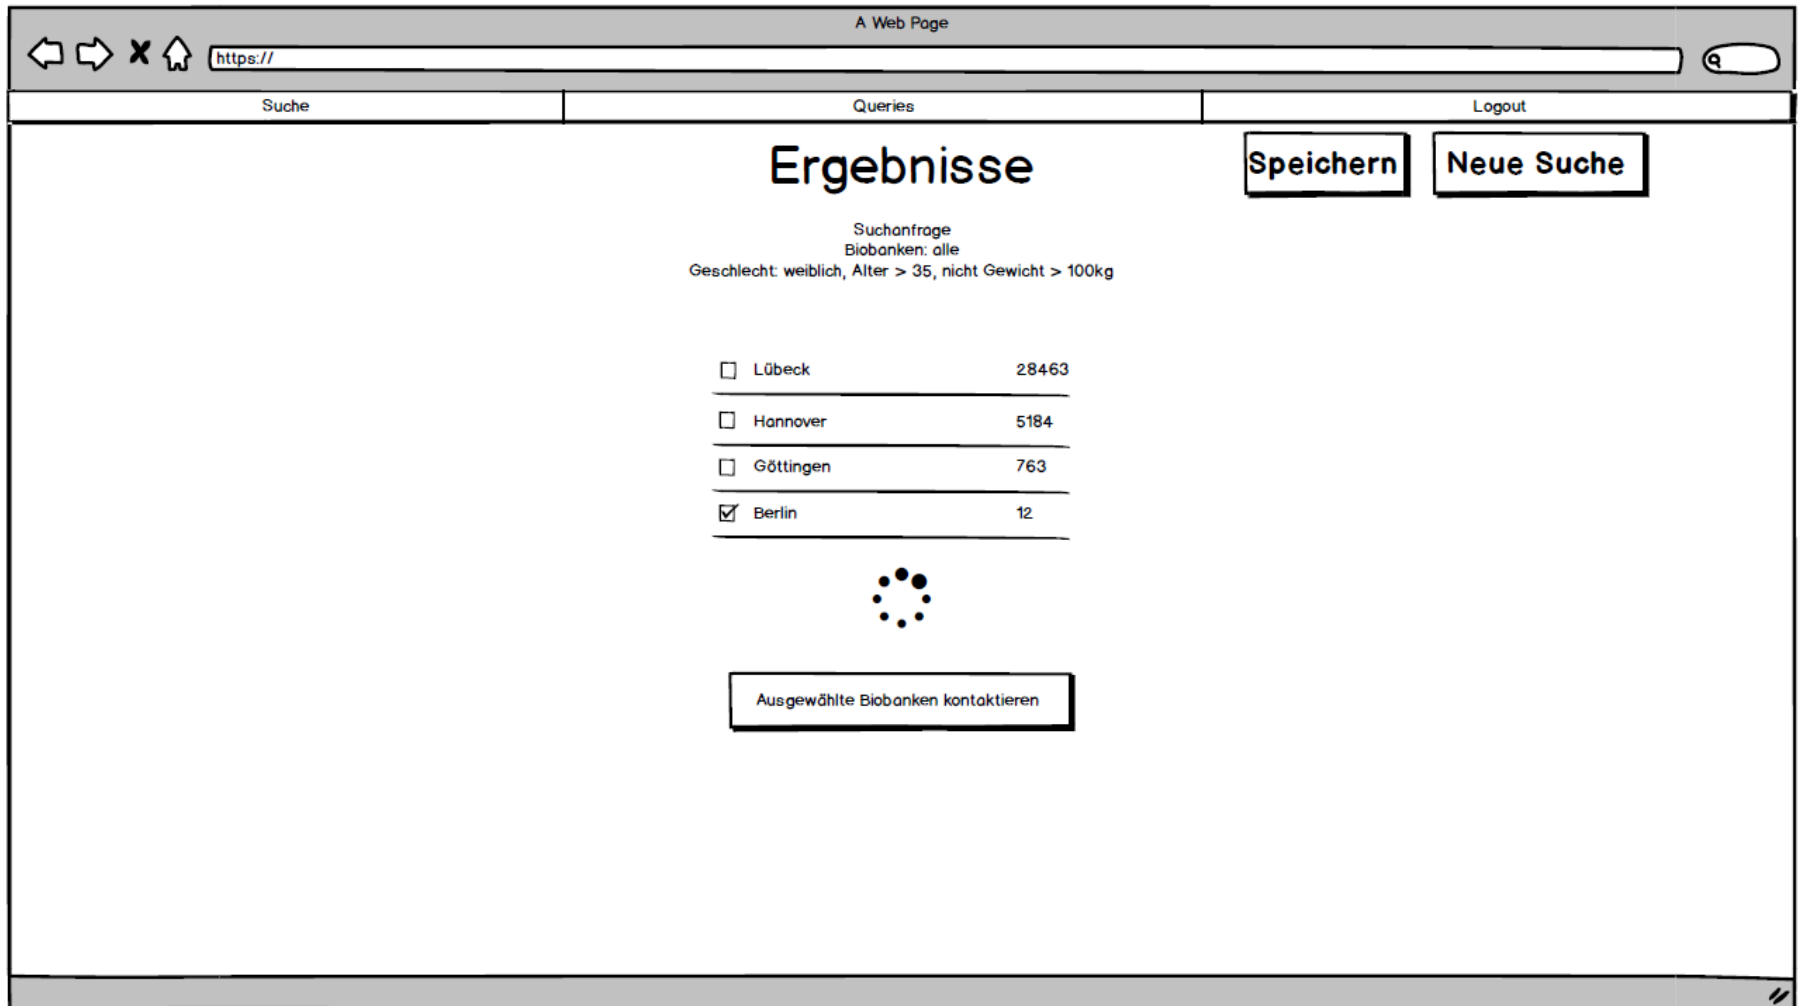

Multimedia Appendix 4. Preliminary Work: Sketched functionalities and workshop mockups.  
Schüttler et al: Usability Analysis of the "Sample Locator": a Federated Online Search Tool for Biospecimens

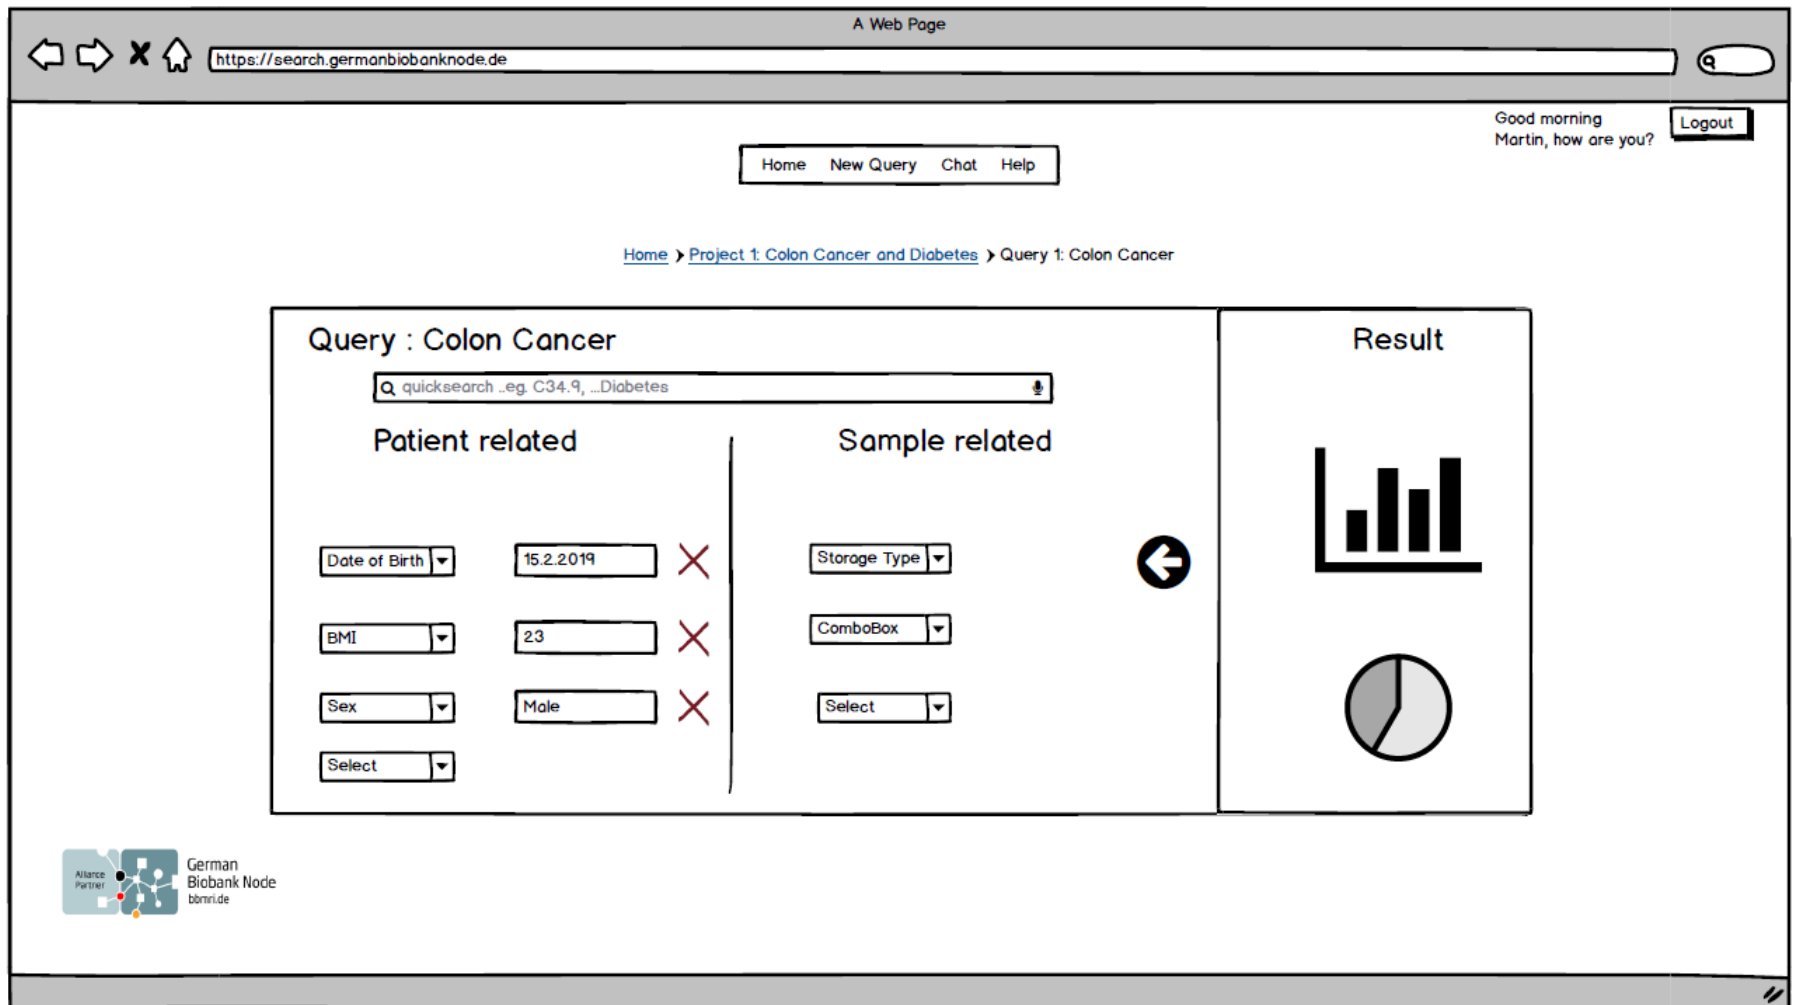



The screenshot shows a web browser window with the URL <https://search.germanbiobanknode.de>. The page has a navigation bar with links for Home, New Query, Chat, and Help. A user greeting "Good morning Martin, how are you?" and a Logout button are visible in the top right. The main content area displays search results for "Query : Colon Cancer".

**Query : Colon Cancer**

**Patient related**  
Date of Birth: 15.2.2019  
Sex: Male, Female

**Sample related**  
Sample Type: Froze Tissue

**Result**

| Biobank    | Donors | Samples | Chat | Add                                 |
|------------|--------|---------|------|-------------------------------------|
| Würzburg   | 30     | 30      | 1    | <input checked="" type="checkbox"/> |
| Heidelberg | 200    | 400     |      | <input type="checkbox"/>            |
| München    | <10    | 12      |      | <input checked="" type="checkbox"/> |
| Leipzig    | 150    | 159     |      | <input checked="" type="checkbox"/> |
| More...    |        |         |      |                                     |

An "Open" button with a chat icon is located below the table.

**German Biobank Node**  
Alliance Partner  
bbmri.de
