# Supplementary material for: A Federated Online Search Tool for Biospecimens (Sample Locator): Usability Study
Source: PubMed Central journal article supplement (PMC7463387; doi:10.2196/17739), 2020-08-18
Supplement: jmir_v22i8e17739_app5.pdf [file jmir_v22i8e17739_app5.pdf]

Multimedia Appendix 5. Screenshots prototype.

Schüttler et al: Usability Analysis of the “Sample Locator”: a Federated Online Search Tool for Biospecimens

# Multimedia Appendix 5 – Screenshots prototype

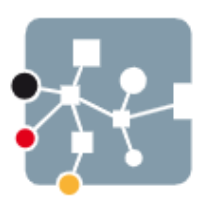

## Sample Locator

Search across biobanks for human biosamples and related data.

The Sample Locator allows a search for various criteria, such as sample type or ICD code.

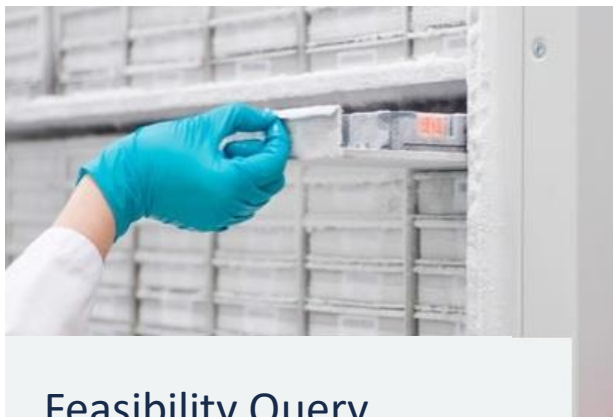

### Feasibility Query

How many samples that meet your criteria are available in total? >

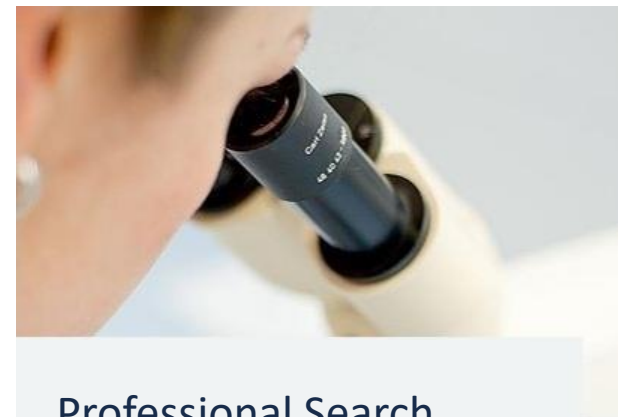

### Professional Search

Log in to view sample locations and to request samples. >

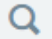

| Search                                                                                                                    | Result                                                                                                                                                                                                                                                                                |                |     |               |     |
|---------------------------------------------------------------------------------------------------------------------------|---------------------------------------------------------------------------------------------------------------------------------------------------------------------------------------------------------------------------------------------------------------------------------------|----------------|-----|---------------|-----|
| <p><b>Donor-related criteria</b> ?</p> <p>Sex: male ✕</p> <p>Diagnosis: C34 ✕</p> <p><b>Sample-related criteria</b> ?</p> | <p><b>Potential matches:</b></p> <table border="1"> <tr> <td><b>Samples</b></td> <td>846</td> </tr> <tr> <td><b>Donors</b></td> <td>846</td> </tr> </table> <p>To view the samples per biobank, manage your projects and search queries, and contact the biobanks, please log in.</p> | <b>Samples</b> | 846 | <b>Donors</b> | 846 |
| <b>Samples</b>                                                                                                            | 846                                                                                                                                                                                                                                                                                   |                |     |               |     |
| <b>Donors</b>                                                                                                             | 846                                                                                                                                                                                                                                                                                   |                |     |               |     |
| <p><b>CLEAR</b> <b>EDIT</b></p>                                                                                           | <p><b>LOGIN</b></p>                                                                                                                                                                                                                                                                   |                |     |               |     |

## Login

Username

Password

[BACK](#)

[LOGIN](#)

[Register](#)

[Forgot your password?](#)



## Project description

Project titel\*

Pulmonary carcinoma

Research question\*

Characterisation PCa

Material requested\* ?

Tumor tissue

Data requested\* ?

Clinical data

Result data\* ?

Not yet defined

Ethics vote ?

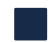

available

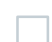

not available

Orientation\* ?

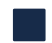

non-profit

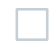

profit

Comment

\*required

CANCEL

CONTINUE



| Search                                                                        | Result                                                                                                                                                                                                                                                                                                                                                                                                                        |            |         |        |        |     |     |        |     |     |            |    |    |           |    |    |                 |            |            |
|-------------------------------------------------------------------------------|-------------------------------------------------------------------------------------------------------------------------------------------------------------------------------------------------------------------------------------------------------------------------------------------------------------------------------------------------------------------------------------------------------------------------------|------------|---------|--------|--------|-----|-----|--------|-----|-----|------------|----|----|-----------|----|----|-----------------|------------|------------|
| <p><b>Donor-related criteria</b> ?</p> <p>Sex: male</p> <p>Diagnosis: C34</p> | <table border="1"> <thead> <tr> <th>Biobank</th> <th>Samples</th> <th>Donors</th> </tr> </thead> <tbody> <tr> <td>Lübeck</td> <td>554</td> <td>554</td> </tr> <tr> <td>Aachen</td> <td>250</td> <td>250</td> </tr> <tr> <td>Greifswald</td> <td>22</td> <td>22</td> </tr> <tr> <td>Frankfurt</td> <td>20</td> <td>20</td> </tr> <tr> <td><b>In total</b></td> <td><b>846</b></td> <td><b>846</b></td> </tr> </tbody> </table> | Biobank    | Samples | Donors | Lübeck | 554 | 554 | Aachen | 250 | 250 | Greifswald | 22 | 22 | Frankfurt | 20 | 20 | <b>In total</b> | <b>846</b> | <b>846</b> |
| Biobank                                                                       | Samples                                                                                                                                                                                                                                                                                                                                                                                                                       | Donors     |         |        |        |     |     |        |     |     |            |    |    |           |    |    |                 |            |            |
| Lübeck                                                                        | 554                                                                                                                                                                                                                                                                                                                                                                                                                           | 554        |         |        |        |     |     |        |     |     |            |    |    |           |    |    |                 |            |            |
| Aachen                                                                        | 250                                                                                                                                                                                                                                                                                                                                                                                                                           | 250        |         |        |        |     |     |        |     |     |            |    |    |           |    |    |                 |            |            |
| Greifswald                                                                    | 22                                                                                                                                                                                                                                                                                                                                                                                                                            | 22         |         |        |        |     |     |        |     |     |            |    |    |           |    |    |                 |            |            |
| Frankfurt                                                                     | 20                                                                                                                                                                                                                                                                                                                                                                                                                            | 20         |         |        |        |     |     |        |     |     |            |    |    |           |    |    |                 |            |            |
| <b>In total</b>                                                               | <b>846</b>                                                                                                                                                                                                                                                                                                                                                                                                                    | <b>846</b> |         |        |        |     |     |        |     |     |            |    |    |           |    |    |                 |            |            |
| <p><b>Sample-related criteria</b> ?</p>                                       |                                                                                                                                                                                                                                                                                                                                                                                                                               |            |         |        |        |     |     |        |     |     |            |    |    |           |    |    |                 |            |            |
| <p><b>CLEAR</b></p> <p><b>EDIT</b></p>                                        | <p><b>NEGOTIATE</b></p> <p><b>SAVE RESULTS</b></p>                                                                                                                                                                                                                                                                                                                                                                            |            |         |        |        |     |     |        |     |     |            |    |    |           |    |    |                 |            |            |



| Search                           |                    | Result              |  |  |
|----------------------------------|--------------------|---------------------|--|--|
| <b>Donor-related criteria</b> ?  |                    |                     |  |  |
| Sex                              | male               |                     |  |  |
| Diagnosis                        | C34                |                     |  |  |
| <b>Sample-related criteria</b> ? |                    |                     |  |  |
|                                  | Diagnosis          | C77                 |  |  |
| OR                               | Diagnosis          | C78                 |  |  |
| NOT                              | Diagnosis          | C79                 |  |  |
|                                  | Sample type tissue | Tissue formalin     |  |  |
| <b>CLEAR</b>                     |                    | <b>NEGOTIATE</b>    |  |  |
| <b>EDIT</b>                      |                    | <b>SAVE RESULTS</b> |  |  |

| Biobank    | Samples | Donors |
|------------|---------|--------|
| Lübeck     | 60      | 55     |
| Aachen     | 25      | 22     |
| Greifswald | 10      | 8      |
| Frankfurt  | 10      | 10     |
| In total   | 105     | 95     |



| Search                           |                    |                 |  | Result                  |  |  |
|----------------------------------|--------------------|-----------------|--|-------------------------|--|--|
| <b>Donor-related criteria</b> ?  |                    |                 |  |                         |  |  |
|                                  | Sex                | male            |  |                         |  |  |
|                                  | Diagnosis          | C34             |  |                         |  |  |
| <b>Sample-related criteria</b> ? |                    |                 |  |                         |  |  |
|                                  | Diagnosis          | C77             |  |                         |  |  |
| OR                               | Diagnosis          | C78             |  |                         |  |  |
| NOT                              | Diagnosis          | C79             |  |                         |  |  |
|                                  | Sample type tissue | Tissue formalin |  |                         |  |  |
| <b>CLEAR</b>                     |                    |                 |  | <b>NEGOTIATE</b>        |  |  |
| <b>EDIT</b>                      |                    |                 |  | <b>PROJECT OVERVIEW</b> |  |  |

  

| Biobank                                    | Samples | Donors |
|--------------------------------------------|---------|--------|
| <input checked="" type="checkbox"/> Lübeck | 60      | 55     |
| <input checked="" type="checkbox"/> Aachen | 25      | 22     |
| <input type="checkbox"/> Greifswald        | 10      | 8      |
| <input type="checkbox"/> Frankfurt         | 10      | 10     |
| In total                                   | 105     | 95     |





Project „Pulmonary carcinoma“

EDIT

Query from 15.04.2019, 11:26

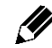

VIEW

ACTIVE CHATS

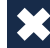

ADD NEW QUERY

BACK

NEW PROJECT



Projekt: „ Pulmonary carcinoma“ Query from 15.04.2019, 11:26

Selected Biobanks: ?

AACHEN

LÜBECK

15.04.2019

Max Mustermann

I need samples from patients with lung cancer. Either frozen tissue or FFPE sections. Ideally from several pieces of the tumor.

Are such samples available at your site?

11:28

Erika Musterfrau (Biobank Lübeck)

How many samples do you need?

11:36

Markus Möglich (Biobank Aachen)

We have 25 samples, but the FFPE cuts are not from several pieces of the tumor.

11:47

Compose your message here

BACK

PROJECT OVERVIEW

CLEAR
